# Supplementary material for: Maternal Co-ordinate Gene Regulation and Axis Polarity in the Scuttle Fly Megaselia abdita
Source: PubMed Central journal article supplement (PMC4355411; doi:10.1371/journal.pgen.1005042), 2015-03-10
Supplement: pgen.1005042.s001.pdf [file pgen.1005042.s001.pdf]

**Supporting File S1.**Plots of gene expression boundaries from RNAi-treated embryos of *Megaselia abdita*
